# Supplementary material for: Rapid evolution and strain turnover in the infant gut microbiome
Source: HighWire-hosted journal article supplement (doi:10.1101/gr.276306.121), 2022-05-11
Supplement: Supplemental_Table_S1.xlsx [file Supplemental_Table_S1.xlsx]

## Sheet: Legend
Supplemental Table S1
species	Species (as defined by MIDAS)
timepoint	Infant timepoint category (after birth)
cohort1	Cohort (dataset) 1
n1	Number of samples in cohort 1 with polymorphism rate information for given species
cohort2	Cohort (dataset) 2
n2	Number of samples in cohort 2 with polymorphism rate information for given species
U	Mann-Whitney U test statistic for comparison of polymorphism rates between datasets for matched timepoint categories
p	Mann-Whitney U test p-value for comparison of polymorphism rates between datasets for matched timepoint categories

## Sheet: Supplemental_Table_S1
species	timepoint	cohort1	n1	cohort2	n2	U	p
Escherichia_coli_58110	1 day	ferretti	5	backhed	9	22	1
Escherichia_coli_58110	3 days	ferretti	8	backhed	13	82	0.0302324
Escherichia_coli_58110	4 days	shao	110	backhed	3	167	0.979909
Escherichia_coli_58110	1 week	ferretti	12	yassour	10	56	0.817483
Escherichia_coli_58110	1 week	yassour	10	shao	205	1130	0.586438
Escherichia_coli_58110	1 week	ferretti	12	shao	205	1349	0.575105
Escherichia_coli_58110	2 weeks	yassour	11	shao	2	8	0.641026
Escherichia_coli_58110	1 month	ferretti	10	yassour	17	102	0.407411
Escherichia_coli_58110	1 month	yassour	17	shao	146	1304	0.734346
Escherichia_coli_58110	1 month	ferretti	10	shao	146	935	0.138968
Escherichia_coli_58110	4 months	ferretti	11	backhed	67	467	0.159451
Escherichia_coli_58110	12 months	ferretti	51	backhed	21	663	0.115627
Bacteroides_vulgatus_57955	1 day	ferretti	3	backhed	5	15	0.0357143
Bacteroides_vulgatus_57955	3 days	ferretti	7	backhed	9	12	0.0417832
Bacteroides_vulgatus_57955	4 days	shao	59	backhed	5	151	0.942029
Bacteroides_vulgatus_57955	1 week	ferretti	4	yassour	8	32	0.0040404
Bacteroides_vulgatus_57955	1 week	yassour	8	shao	86	187	0.0321162
Bacteroides_vulgatus_57955	1 week	ferretti	4	shao	86	304	0.00578118
Bacteroides_vulgatus_57955	2 weeks	yassour	10	shao	1	7	0.727273
Bacteroides_vulgatus_57955	1 month	ferretti	3	yassour	12	32	0.0483516
Bacteroides_vulgatus_57955	1 month	yassour	12	shao	54	374	0.410539
Bacteroides_vulgatus_57955	1 month	ferretti	3	shao	54	146	0.013944
Bacteroides_vulgatus_57955	4 months	ferretti	3	backhed	54	131	0.077717
Bacteroides_vulgatus_57955	12 months	ferretti	33	backhed	70	1113	0.769291
Enterococcus_faecalis_56297	1 day	ferretti	4	backhed	3	11	0.114286
Enterococcus_faecalis_56297	3 days	ferretti	7	backhed	4	23	0.109091
Enterococcus_faecalis_56297	4 days	shao	129	backhed	2	132	0.96257
Enterococcus_faecalis_56297	1 week	ferretti	7	yassour	9	26	0.606469
Enterococcus_faecalis_56297	1 week	yassour	9	shao	235	1112	0.794968
Enterococcus_faecalis_56297	1 week	ferretti	7	shao	235	790	0.860821
Enterococcus_faecalis_56297	2 weeks	yassour	7	shao	3	17	0.183333
Enterococcus_faecalis_56297	1 month	ferretti	0	yassour	2	NA	NA
Enterococcus_faecalis_56297	1 month	yassour	2	shao	151	235	0.179835
Enterococcus_faecalis_56297	1 month	ferretti	0	shao	151	NA	NA
Enterococcus_faecalis_56297	4 months	ferretti	3	backhed	24	49	0.351453
Enterococcus_faecalis_56297	12 months	ferretti	3	backhed	1	3	0.5
Bifidobacterium_longum_57796	1 day	ferretti	1	backhed	4	1	0.8
Bifidobacterium_longum_57796	3 days	ferretti	6	backhed	10	31	0.957792
Bifidobacterium_longum_57796	4 days	shao	76	backhed	5	177	0.811989
Bifidobacterium_longum_57796	1 week	ferretti	9	yassour	13	40	0.229362
Bifidobacterium_longum_57796	1 week	yassour	13	shao	147	954	0.995017
Bifidobacterium_longum_57796	1 week	ferretti	9	shao	147	525	0.301271
Bifidobacterium_longum_57796	2 weeks	yassour	17	shao	1	9	1
Bifidobacterium_longum_57796	1 month	ferretti	8	yassour	22	82	0.800523
Bifidobacterium_longum_57796	1 month	yassour	22	shao	126	1608	0.23251
Bifidobacterium_longum_57796	1 month	ferretti	8	shao	126	556	0.634716
Bifidobacterium_longum_57796	4 months	ferretti	8	backhed	82	410	0.253106
Bifidobacterium_longum_57796	12 months	ferretti	76	backhed	48	2376	0.0046674
Bifidobacterium_breve_57133	1 day	ferretti	2	backhed	1	1	1
Bifidobacterium_breve_57133	3 days	ferretti	5	backhed	2	5	1
Bifidobacterium_breve_57133	4 days	shao	44	backhed	0	NA	NA
Bifidobacterium_breve_57133	1 week	ferretti	4	yassour	5	16	0.190476
Bifidobacterium_breve_57133	1 week	yassour	5	shao	110	186	0.224847
Bifidobacterium_breve_57133	1 week	ferretti	4	shao	110	279	0.367645
Bifidobacterium_breve_57133	2 weeks	yassour	6	shao	3	12	0.547619
Bifidobacterium_breve_57133	1 month	ferretti	6	yassour	7	28	0.365967
Bifidobacterium_breve_57133	1 month	yassour	7	shao	85	327	0.675745
Bifidobacterium_breve_57133	1 month	ferretti	6	shao	85	340	0.181228
Bifidobacterium_breve_57133	4 months	ferretti	9	backhed	29	177	0.114241
Bifidobacterium_breve_57133	12 months	ferretti	48	backhed	13	446	0.0187146
Klebsiella_pneumoniae_54788	1 day	ferretti	0	backhed	0	NA	NA
Klebsiella_pneumoniae_54788	3 days	ferretti	0	backhed	0	NA	NA
Klebsiella_pneumoniae_54788	4 days	shao	20	backhed	1	14	0.666667
Klebsiella_pneumoniae_54788	1 week	ferretti	0	yassour	2	NA	NA
Klebsiella_pneumoniae_54788	1 week	yassour	2	shao	59	52	0.796721
Klebsiella_pneumoniae_54788	1 week	ferretti	0	shao	59	NA	NA
Klebsiella_pneumoniae_54788	2 weeks	yassour	2	shao	1	0	0.666667
Klebsiella_pneumoniae_54788	1 month	ferretti	1	yassour	5	3	1
Klebsiella_pneumoniae_54788	1 month	yassour	5	shao	53	108	0.517452
Klebsiella_pneumoniae_54788	1 month	ferretti	1	shao	53	23	0.888889
Klebsiella_pneumoniae_54788	4 months	ferretti	1	backhed	0	NA	NA
Klebsiella_pneumoniae_54788	12 months	ferretti	2	backhed	0	NA	NA
Staphylococcus_epidermidis_57523	1 day	ferretti	0	backhed	1	NA	NA
Staphylococcus_epidermidis_57523	3 days	ferretti	1	backhed	1	1	1
Staphylococcus_epidermidis_57523	4 days	shao	76	backhed	3	56	0.147827
Staphylococcus_epidermidis_57523	1 week	ferretti	4	yassour	6	13	0.914286
Staphylococcus_epidermidis_57523	1 week	yassour	6	shao	185	680	0.359178
Staphylococcus_epidermidis_57523	1 week	ferretti	4	shao	185	505	0.2234
Staphylococcus_epidermidis_57523	2 weeks	yassour	0	shao	1	NA	NA
Staphylococcus_epidermidis_57523	1 month	ferretti	0	yassour	0	NA	NA
Staphylococcus_epidermidis_57523	1 month	yassour	0	shao	71	NA	NA
Staphylococcus_epidermidis_57523	1 month	ferretti	0	shao	71	NA	NA
Staphylococcus_epidermidis_57523	4 months	ferretti	0	backhed	0	NA	NA
Staphylococcus_epidermidis_57523	12 months	ferretti	0	backhed	0	NA	NA
Bacteroides_uniformis_57318	1 day	ferretti	2	backhed	0	NA	NA
Bacteroides_uniformis_57318	3 days	ferretti	4	backhed	5	12	0.730159
Bacteroides_uniformis_57318	4 days	shao	19	backhed	1	3	0.4
Bacteroides_uniformis_57318	1 week	ferretti	2	yassour	6	7	0.857143
Bacteroides_uniformis_57318	1 week	yassour	6	shao	27	110	0.188532
Bacteroides_uniformis_57318	1 week	ferretti	2	shao	27	42	0.241379
Bacteroides_uniformis_57318	2 weeks	yassour	5	shao	0	NA	NA
Bacteroides_uniformis_57318	1 month	ferretti	4	yassour	9	15	0.71049
Bacteroides_uniformis_57318	1 month	yassour	9	shao	26	151	0.206095
Bacteroides_uniformis_57318	1 month	ferretti	4	shao	26	66	0.425251
Bacteroides_uniformis_57318	4 months	ferretti	4	backhed	26	60	0.65915
Bacteroides_uniformis_57318	12 months	ferretti	22	backhed	52	464	0.203614
Bifidobacterium_bifidum_55065	1 day	ferretti	0	backhed	1	NA	NA
Bifidobacterium_bifidum_55065	3 days	ferretti	4	backhed	7	12	0.787879
Bifidobacterium_bifidum_55065	4 days	shao	31	backhed	0	NA	NA
Bifidobacterium_bifidum_55065	1 week	ferretti	2	yassour	2	2	1
Bifidobacterium_bifidum_55065	1 week	yassour	2	shao	59	63	0.887432
Bifidobacterium_bifidum_55065	1 week	ferretti	2	shao	59	57	0.95082
Bifidobacterium_bifidum_55065	2 weeks	yassour	4	shao	2	3	0.8
Bifidobacterium_bifidum_55065	1 month	ferretti	5	yassour	3	12	0.25
Bifidobacterium_bifidum_55065	1 month	yassour	3	shao	40	37	0.298355
Bifidobacterium_bifidum_55065	1 month	ferretti	5	shao	40	142	0.137368
Bifidobacterium_bifidum_55065	4 months	ferretti	8	backhed	34	204	0.0285926
Bifidobacterium_bifidum_55065	12 months	ferretti	36	backhed	14	78	0.000177698
Bacteroides_ovatus_58035	1 day	ferretti	2	backhed	1	2	0.666667
Bacteroides_ovatus_58035	3 days	ferretti	0	backhed	2	NA	NA
Bacteroides_ovatus_58035	4 days	shao	8	backhed	1	8	0.222222
Bacteroides_ovatus_58035	1 week	ferretti	2	yassour	3	5	0.4
Bacteroides_ovatus_58035	1 week	yassour	3	shao	12	12	0.448352
Bacteroides_ovatus_58035	1 week	ferretti	2	shao	12	13	0.923077
Bacteroides_ovatus_58035	2 weeks	yassour	3	shao	0	NA	NA
Bacteroides_ovatus_58035	1 month	ferretti	3	yassour	4	4	0.628571
Bacteroides_ovatus_58035	1 month	yassour	4	shao	10	23	0.733267
Bacteroides_ovatus_58035	1 month	ferretti	3	shao	10	16	0.937063
Bacteroides_ovatus_58035	4 months	ferretti	1	backhed	20	2	0.285714
Bacteroides_ovatus_58035	12 months	ferretti	15	backhed	41	300	0.896952
Veillonella_parvula_57794	1 day	ferretti	0	backhed	0	NA	NA
Veillonella_parvula_57794	3 days	ferretti	0	backhed	0	NA	NA
Veillonella_parvula_57794	4 days	shao	11	backhed	0	NA	NA
Veillonella_parvula_57794	1 week	ferretti	2	yassour	1	0	0.666667
Veillonella_parvula_57794	1 week	yassour	1	shao	42	28	0.697674
Veillonella_parvula_57794	1 week	ferretti	2	shao	42	7	0.0422833
Veillonella_parvula_57794	2 weeks	yassour	1	shao	1	1	1
Veillonella_parvula_57794	1 month	ferretti	0	yassour	2	NA	NA
Veillonella_parvula_57794	1 month	yassour	2	shao	12	12	1
Veillonella_parvula_57794	1 month	ferretti	0	shao	12	NA	NA
Veillonella_parvula_57794	4 months	ferretti	4	backhed	6	8	0.47619
Veillonella_parvula_57794	12 months	ferretti	7	backhed	2	6	0.888889
Alistipes_putredinis_61533	1 day	ferretti	3	backhed	0	NA	NA
Alistipes_putredinis_61533	3 days	ferretti	0	backhed	1	NA	NA
Alistipes_putredinis_61533	4 days	shao	0	backhed	0	NA	NA
Alistipes_putredinis_61533	1 week	ferretti	1	yassour	0	NA	NA
Alistipes_putredinis_61533	1 week	yassour	0	shao	0	NA	NA
Alistipes_putredinis_61533	1 week	ferretti	1	shao	0	NA	NA
Alistipes_putredinis_61533	2 weeks	yassour	0	shao	0	NA	NA
Alistipes_putredinis_61533	1 month	ferretti	1	yassour	0	NA	NA
Alistipes_putredinis_61533	1 month	yassour	0	shao	1	NA	NA
Alistipes_putredinis_61533	1 month	ferretti	1	shao	1	1	1
Alistipes_putredinis_61533	4 months	ferretti	0	backhed	1	NA	NA
Alistipes_putredinis_61533	12 months	ferretti	2	backhed	12	14	0.791209
Bacteroides_fragilis_54507	1 day	ferretti	0	backhed	4	NA	NA
Bacteroides_fragilis_54507	3 days	ferretti	0	backhed	4	NA	NA
Bacteroides_fragilis_54507	4 days	shao	24	backhed	4	71	0.144176
Bacteroides_fragilis_54507	1 week	ferretti	0	yassour	4	NA	NA
Bacteroides_fragilis_54507	1 week	yassour	4	shao	35	72	0.946639
Bacteroides_fragilis_54507	1 week	ferretti	0	shao	35	NA	NA
Bacteroides_fragilis_54507	2 weeks	yassour	3	shao	1	2	1
Bacteroides_fragilis_54507	1 month	ferretti	0	yassour	5	NA	NA
Bacteroides_fragilis_54507	1 month	yassour	5	shao	21	47	0.75263
Bacteroides_fragilis_54507	1 month	ferretti	0	shao	21	NA	NA
Bacteroides_fragilis_54507	4 months	ferretti	0	backhed	34	NA	NA
Bacteroides_fragilis_54507	12 months	ferretti	24	backhed	39	459	0.904242
