# Supplementary material for: Rapid evolution and strain turnover in the infant gut microbiome
Source: HighWire-hosted journal article supplement (doi:10.1101/gr.276306.121), 2022-05-11
Supplement: Supplemental_Table_S2.xlsx [file Supplemental_Table_S2.xlsx]

## Sheet: Legend
Supplemental Table S2
type	One of "SNV change rate", "replacement rate", "gene gain", "gene loss" (comparisons between timepoint categories) or "gene gain vs. loss" (comparison within a timepoint category)
tp_type_1	First timepoint category
tp_type_2	Second timepoint category (NA for comparison type "gene gain vs. loss")
n1	Number of QP (sample-sample-species) pairs in first timepoint category with temporal change information for given type
n2	Number of QP (sample-sample-species) pairs in second timepoint category with temporal change information for given type
permuation_p	Permutation test p-value for comparison of temporal change rates of given type between timepoint categories, or between gene gain and gene loss in the same timepoint category
Benjamini-Hochberg_adjusted_p_value	Benjamini-Hochberg adjusted permutation test p-value

## Sheet: Supplemental_Table_S2
type	tp_type_1	tp_type_2	n1	n2	permuation_p	Benjamini-Hochberg_adjusted_p_value
SNV change rate	Mother-Infant	Day 0-Week 1	54	365	0.0085	0.0123387
SNV change rate	Mother-Infant	Week 1-Month 1	54	503	<0.0001	0.000166667
SNV change rate	Mother-Infant	Month 1-Year 1	54	105	<0.0001	0.000166667
SNV change rate	Mother-Infant	Adult-Adult	54	987	<0.0001	0.000166667
SNV change rate	Day 0-Week 1	Week 1-Month 1	365	503	0.1309	0.159689
SNV change rate	Day 0-Week 1	Month 1-Year 1	365	105	<0.0001	0.000166667
SNV change rate	Day 0-Week 1	Adult-Adult	365	987	<0.0001	0.000166667
SNV change rate	Week 1-Month 1	Month 1-Year 1	503	105	<0.0001	0.000166667
SNV change rate	Week 1-Month 1	Adult-Adult	503	987	<0.0001	0.000166667
SNV change rate	Month 1-Year 1	Adult-Adult	105	987	0.0319	0.0448594
replacement rate	Mother-Infant	Day 0-Week 1	59	376	0.1313	0.159689
replacement rate	Mother-Infant	Week 1-Month 1	59	514	<0.0001	0.000166667
replacement rate	Mother-Infant	Month 1-Year 1	59	123	<0.0001	0.000166667
replacement rate	Mother-Infant	Adult-Adult	59	1017	<0.0001	0.000166667
replacement rate	Day 0-Week 1	Week 1-Month 1	376	514	<0.0001	0.000166667
replacement rate	Day 0-Week 1	Month 1-Year 1	376	123	<0.0001	0.000166667
replacement rate	Day 0-Week 1	Adult-Adult	376	1017	<0.0001	0.000166667
replacement rate	Week 1-Month 1	Month 1-Year 1	514	123	0.2469	0.284885
replacement rate	Week 1-Month 1	Adult-Adult	514	1017	<0.0001	0.000166667
replacement rate	Month 1-Year 1	Adult-Adult	123	1017	<0.0001	0.000166667
gene gain	Mother-Infant	Day 0-Week 1	53	365	0.1251	0.159689
gene gain	Mother-Infant	Week 1-Month 1	53	503	0.3426	0.367071
gene gain	Mother-Infant	Month 1-Year 1	53	105	0.3969	0.41536
gene gain	Mother-Infant	Adult-Adult	53	987	<0.0001	0.000166667
gene gain	Day 0-Week 1	Week 1-Month 1	365	503	<0.0001	0.000166667
gene gain	Day 0-Week 1	Month 1-Year 1	365	105	<0.0001	0.000166667
gene gain	Day 0-Week 1	Adult-Adult	365	987	<0.0001	0.000166667
gene gain	Week 1-Month 1	Month 1-Year 1	503	105	0.0019	0.00294828
gene gain	Week 1-Month 1	Adult-Adult	503	987	<0.0001	0.000166667
gene gain	Month 1-Year 1	Adult-Adult	105	987	<0.0001	0.000166667
gene loss	Mother-Infant	Day 0-Week 1	53	365	0.4954	0.4954
gene loss	Mother-Infant	Week 1-Month 1	53	503	0.2593	0.291712
gene loss	Mother-Infant	Month 1-Year 1	53	105	<0.0001	0.000166667
gene loss	Mother-Infant	Adult-Adult	53	987	<0.0001	0.000166667
gene loss	Day 0-Week 1	Week 1-Month 1	365	503	0.105	0.138971
gene loss	Day 0-Week 1	Month 1-Year 1	365	105	<0.0001	0.000166667
gene loss	Day 0-Week 1	Adult-Adult	365	987	<0.0001	0.000166667
gene loss	Week 1-Month 1	Month 1-Year 1	503	105	<0.0001	0.000166667
gene loss	Week 1-Month 1	Adult-Adult	503	987	<0.0001	0.000166667
gene loss	Month 1-Year 1	Adult-Adult	105	987	0.1678	0.198711
gene gain vs. loss	Mother-Infant	NA	53	53	0.0013	0.00208929
gene gain vs. loss	Day 0-Week 1	NA	365	365	0.4474	0.457568
gene gain vs. loss	Week 1-Month 1	NA	503	503	0.0648	0.0883636
gene gain vs. loss	Month 1-Year 1	NA	105	105	0.0053	0.00795
gene gain vs. loss	Adult-Adult	NA	987	987	0.2987	0.327841
