# Supplementary material for: Rapid evolution and strain turnover in the infant gut microbiome
Source: HighWire-hosted journal article supplement (doi:10.1101/gr.276306.121), 2022-05-11
Supplement: Supplemental_Table_S3.xlsx [file Supplemental_Table_S3.xlsx]

## Sheet: Supplemental_Table_S3
Supplemental Table S3
MI_num_hosts	Number of unique mother-infant hosts experiencing SNV changes (in evolutionary modification events) in given gene annotation
II_num_hosts	Number of unique infant hosts experiencing SNV changes in given gene annotation
AA_num_hosts	Number of unique infant hosts experiencing SNV changes in given gene annotation
total_unique_hosts	Total number of unique hosts experiencing SNV changes in given gene annotation (equal to sum of MI, II and AA host counts)
total_snp_changes	Total number of SNV changes in given gene annotation across host types
total_pres_null	Expected number of SNV changes in given gene annotation under "present gene" null (genes randomly sampled from all genes present at either timepoint in QP pairs)
total_pang_null	Expected number of SNV changes in given gene annotation under "pangenome" null (genes randomly sampled from all known genomes for species present at either timepoint in QP pairs)
gene_name	Gene pathway annotation (KEGG pathway description from PATRIC database)
gene_ids	Gene IDs (KEGG) of SNV changes that map to given gene annotation
